# Supplementary material for: Optimization and kinetic modeling of Trametes maxima IIPLC-32 laccase and application in recalcitrant dye decolorization
Source: Royal Society of Chemistry journal article supplement (doi:10.1039/d0nj05179a), 2020-12-28
Supplement: d0nj05179a1.pdf [file d0nj05179a1.pdf]

## Supplementary Information

### **Optimization and kinetic modeling of *Trametes maxima* HPLC-32 laccase and application in recalcitrant dye degradation.**

Sunil Kumar Suman <sup>a,b</sup>, Manisha Malhotra <sup>a</sup>, Shailendra Singh khichi <sup>b</sup>, Sanjoy Ghosh <sup>b</sup>,  
Suman lata Jain <sup>a\*</sup>

\* Corresponding author:

<sup>a</sup> CSIR-Indian Institute of Petroleum, Mohkampur, Dehradun 248005, India

Tel: +91-135-2525788; Fax: +91-135-2660098; E-mail: [sumanjain@hotmail.com](mailto:sumanjain@hotmail.com)

<sup>b</sup> Indian Institute of Technology Roorkee, India

**Fig. S1.**

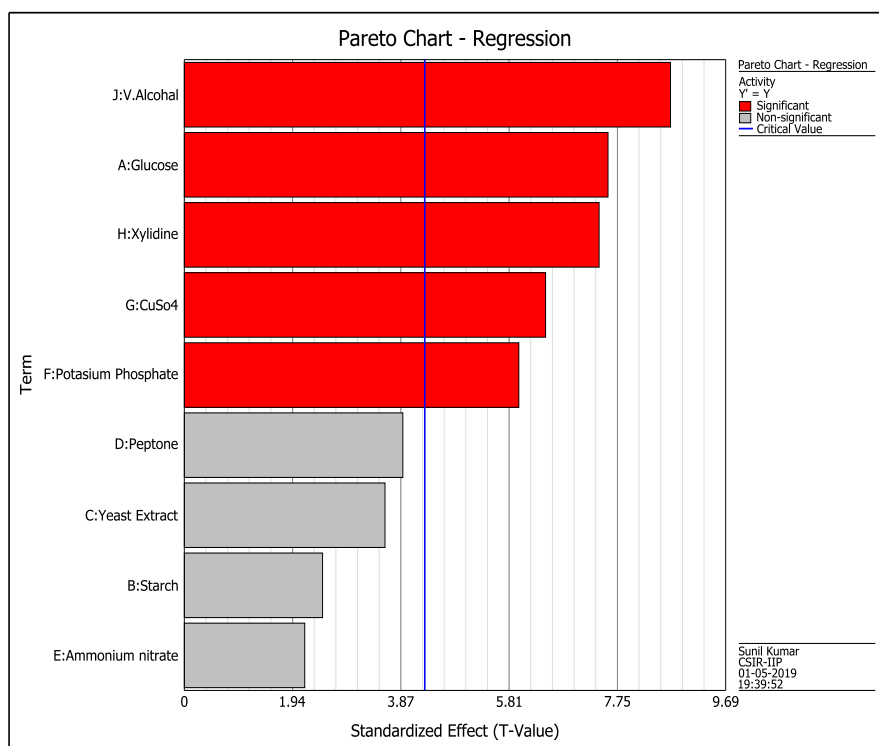

**Fig. S1.** Pareto chart showing the effect of various factors on laccase production. Significant factors are in red while the non-significant factors are in gray. The critical value is represented in blue.

**Fig. S2.**

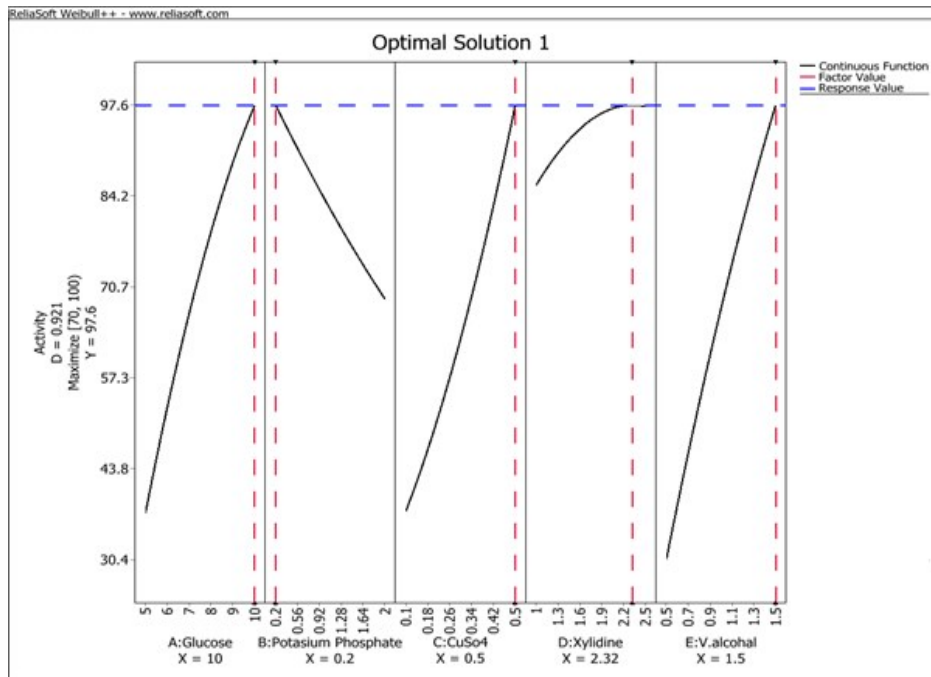

**Fig. S2.** Optimized conditions for the laccase production predicted by reliasoft DOE.

**Table S1 Assigned concentration of variables at different levels in Plackett–Burman Design (PBD) for Screening of factors.**

| <b>S.No.</b> | <b>Variables with designation</b> | <b>Lower level (-)</b>   | <b>Higher level (+)</b> |
|--------------|-----------------------------------|--------------------------|-------------------------|
| 1            | Glucose (A)                       | 5 (g L <sup>-1</sup> )   | 10 (g L <sup>-1</sup> ) |
| 2            | Starch (B)                        | 5 (g L <sup>-1</sup> )   | 10 (g L <sup>-1</sup> ) |
| 3            | Yeast extract (C)                 | 2.5 (g L <sup>-1</sup> ) | 5 (g L <sup>-1</sup> )  |
| 4            | Peptone (D)                       | 2.5 (g L <sup>-1</sup> ) | 5 (g L <sup>-1</sup> )  |
| 5            | Ammonium nitrate (E)              | 0.2 (g L <sup>-1</sup> ) | 2 (g L <sup>-1</sup> )  |
| 6            | Potassium Phosphate (F)           | 0.2 (g L <sup>-1</sup> ) | 2 (g L <sup>-1</sup> )  |
| 7            | CuSO <sub>4</sub> (G)             | 0.1 (mM)                 | 0.5 (mM)                |
| 8            | Xylidine (H)                      | 1 (mM)                   | 2.5 (mM)                |
| 9            | V. Alcohol (I)                    | 0.5 (mM)                 | 1.5 (mM)                |

**Table S2 Concentration of variables used in Box –Behnken Design (BBD) for optimization.**

| <b>S.N.</b> | <b>Variable</b>                          | <b>Low</b> | <b>Center<br/>point</b> | <b>High</b> |
|-------------|------------------------------------------|------------|-------------------------|-------------|
| <b>1</b>    | Glucose (g L <sup>-1</sup> )             | 5.0        | 7.5                     | 10          |
| <b>2</b>    | Potassium phosphate (g L <sup>-1</sup> ) | 0.2        | 1.1                     | 2.0         |
| <b>3</b>    | CuSO <sub>4</sub> (mM)                   | 0.1        | 0.3                     | 0.5         |
| <b>4</b>    | Xylidine (mM)                            | 1.0        | 1.75                    | 2.5         |
| <b>5</b>    | Veratryl alcohol (mM)                    | 0.5        | 1.0                     | 1.50        |

**Table S3 Effect of compounds on laccase production individually and in combination.**

|                        | <b>Compounds</b>                              | <b>Laccase activity (IU mL<sup>-1</sup>)</b> |
|------------------------|-----------------------------------------------|----------------------------------------------|
| <b>Carbon source</b>   | Glucose                                       | 1.01±0.32                                    |
|                        | Sucrose                                       | 0.34±0.15                                    |
|                        | Maltose                                       | 0.57±0.14                                    |
|                        | Lactose                                       | 0.37±0.12                                    |
|                        | Starch                                        | 0.61±0.11                                    |
|                        | Glucose + Sucrose                             | 1.23±0.13                                    |
|                        | Glucose + Maltose                             | 1.32±0.10                                    |
|                        | Glucose + Lactose                             | 0.99±0.21                                    |
|                        | Glucose + Starch                              | 1.54±0.28                                    |
| <b>Nitrogen source</b> | Ammonium Nitrate                              | 1.21±0.31                                    |
|                        | Sodium Nitrate                                | 0.54±0.11                                    |
|                        | Yeast Extract                                 | 1.15±0.30                                    |
|                        | Peptone                                       | 1.01±0.29                                    |
| <b>Inducer</b>         | No inducer                                    | 0.34±0.01                                    |
|                        | CuSO <sub>4</sub>                             | 3.88±1.17                                    |
|                        | Xylidin                                       | 2.72±0.47                                    |
|                        | Veratryl Alcohol                              | 2.55±0.70                                    |
|                        | CuSO <sub>4</sub> + Xylidin+ Veratryl Alcohol | 7.77±0.78                                    |
